# Supplementary material for: Factors Associated with HIV Drug Resistance in Dar es Salaam, Tanzania: Analysis of a Complex Adaptive System
Source: MDPI journal article supplement (doi:10.3390/pathogens10121535), 2021-11-24
Supplement: s1 [file s1]

## Supplementary Materials

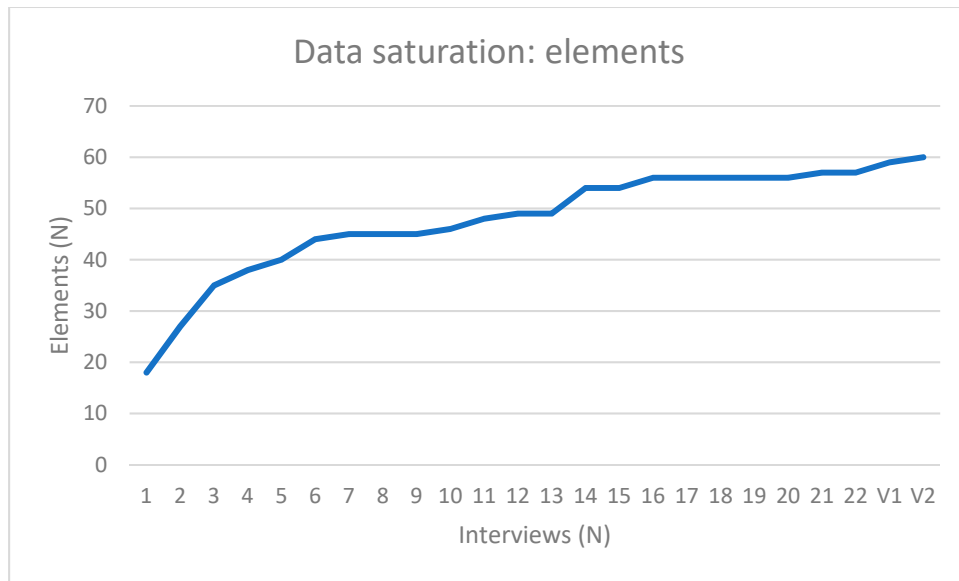

Figure S1: **data saturation elements**. Data saturation curve of the number of elements after each interview and workshop. V1 and V2 stand for the validation workshops.

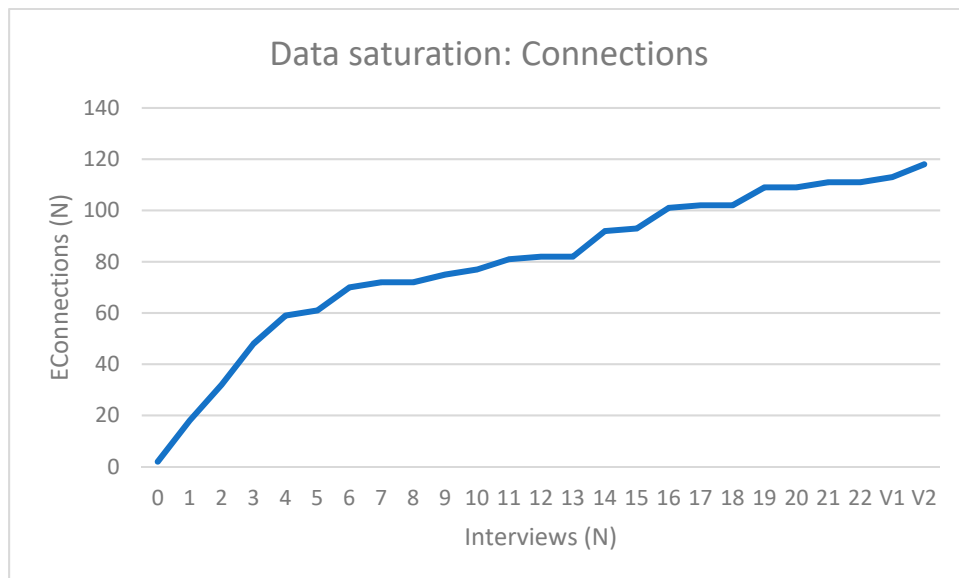

Figure S2: **data saturation connections**. Data saturation curve of the number of connections after each interview and workshop. V1 and V2 stand for the validation workshops.
