# Supplementary material for: Factors Associated with HIV Drug Resistance in Dar es Salaam, Tanzania: Analysis of a Complex Adaptive System
Source: Pathogens. 2021 Nov 24;10(12):1535. doi: 10.3390/pathogens10121535 (PMC8707982; doi:10.3390/pathogens10121535)
Supplement: Supplementary file 1 [file pathogens-10-01535-s001.zip › Table S1.xlsx]

## Sheet: Elements
Element
Acceptance of HIV satus
Accessibility of health center
Adherence
Appetite
Asking help of colleagues
Availability and quality of equipment
Carrying medication
Client education level
Client's access to parameters
Community education
Competence of healthcare workers
Concerns about side effects of ART
Counseling
Distance to the healthcare facility
Employment
Engagement and retention in care
Examples of healthy people using ART
Food insecurity
Forgetfulness
Gender inequality
Healthcare system workload
HIV clinical manifestations
HIV status disclosure
HIV(DR) transmission
HIVDR selection
Libido
Marriage conflicts
Media
Medical privacy
Migration
Motivation to protect others
NGO's
Patients knowledge on HIV(DR)
Personal financial situation
Pill burden
Pill fatigue
Positive patient-provider relationship
Quality of data systems
Religious influence
Remuneration of CHW
Required frequency of hospital visits
Self stigmatisation
Self-efficacy / Self-worth
Side effects of ART
Social empowerment
Social obligations
Social support
Society's knowledge on HIV(DR)
Stigma
Stock availability of ART and reagents
Strict following of guidelines
Substance abuse
Tracing of PLHIV
Traditional medicine
Turnaround time / Timely acting on unsuppressed viral load
Viral load suppression
VL and CD4 count testing
Waiting time at the healthcare facility
Well functioning supply chain

## Sheet: Connections
From	To
Acceptance of HIV satus	Substance abuse
Acceptance of HIV satus	Engagement and retention in care
Acceptance of HIV satus	Adherence
Accessibility of health center	Engagement and retention in care
Adherence	Viral load suppression
Adherence	HIV status disclosure
Adherence	Side effects of ART
Adherence	HIV clinical manifestations
Appetite	Food insecurity
Asking help of colleagues	Healthcare system workload
Availability and quality of equipment	VL and CD4 count testing
Carrying medication	HIV status disclosure
Carrying medication	Adherence
Client education level	Patients knowledge on HIV(DR)
Client's access to parameters	Self-efficacy / Self-worth
Community education	Society's knowledge on HIV(DR)
Competence of healthcare workers	Asking help of colleagues
Competence of healthcare workers	Counseling
Competence of healthcare workers	Positive patient-provider relationship
Concerns about side effects of ART	Adherence
Counseling	Engagement and retention in care
Counseling	HIV status disclosure
Counseling	Self stigmatisation
Counseling	Strict following of guidelines
Counseling	Concerns about side effects of ART
Counseling	Social empowerment
Counseling	Acceptance of HIV satus
Counseling	Adherence
Counseling	Patients knowledge on HIV(DR)
Distance to the healthcare facility	Medical privacy
Distance to the healthcare facility	Accessibility of health center
Employment	Engagement and retention in care
Employment	Carrying medication
Employment	Personal financial situation
Engagement and retention in care	Adherence
Examples of healthy people using ART	Adherence
Food insecurity	Adherence
Forgetfulness	Adherence
Gender inequality	HIV(DR) transmission
Healthcare system workload	Counseling
Healthcare system workload	Waiting time at the healthcare facility
HIV clinical manifestations	Employment
HIV clinical manifestations	Self-efficacy / Self-worth
HIV clinical manifestations	Engagement and retention in care
HIV clinical manifestations	HIV status disclosure
HIV clinical manifestations	Adherence
HIV status disclosure	Community education
HIV status disclosure	Marriage conflicts
HIV status disclosure	HIV(DR) transmission
HIV status disclosure	Social support
HIV status disclosure	Stigma
HIV(DR) transmission	Healthcare system workload
HIVDR selection	HIV clinical manifestations
HIVDR selection	Required frequency of hospital visits
Libido	HIV(DR) transmission
Media	Patients knowledge on HIV(DR)
Medical privacy	HIV status disclosure
Migration	Engagement and retention in care
Motivation to protect others	HIV status disclosure
Motivation to protect others	HIV(DR) transmission
Motivation to protect others	Adherence
Patients knowledge on HIV(DR)	HIV(DR) transmission
Patients knowledge on HIV(DR)	Adherence
Personal financial situation	Migration
Personal financial situation	Engagement and retention in care
Personal financial situation	HIV(DR) transmission
Personal financial situation	Accessibility of health center
Personal financial situation	Food insecurity
Pill burden	Self stigmatisation
Pill burden	Pill fatigue
Pill fatigue	Adherence
Positive patient-provider relationship	Acceptance of HIV satus
Positive patient-provider relationship	Counseling
Positive patient-provider relationship	Engagement and retention in care
Quality of data systems	Turn around time
Religious influence	Acceptance of HIV satus
Religious influence	Adherence
Remuneration of CHW	Engagement and retention in care
Required frequency of hospital visits	Healthcare system workload
Required frequency of hospital visits	HIV status disclosure
Self stigmatisation	Acceptance of HIV satus
Self stigmatisation	HIV status disclosure
Self stigmatisation	Engagement and retention in care
Self-efficacy / Self-worth	Adherence
Side effects of ART	Libido
Side effects of ART	Adherence
Side effects of ART	Appetite
Social activities	Carrying medication
Social empowerment	Adherence
Social obligations	Carrying medication
Social support	Engagement and retention in care
Social support	Acceptance of HIV satus
Social support	Food insecurity
Social support	Personal financial situation
Social support	Adherence
Society's knowledge on HIV(DR)	Stigma
Society's knowledge on HIV(DR)	Social support
Stigma	Carrying medication
Stigma	Self-efficacy / Self-worth
Stigma	Employment
Stigma	Marriage conflicts
Stigma	Self stigmatisation
Stigma	Distance to the healthcare facility
Stigma	HIV status disclosure
Strict following of guidelines	Adherence
Substance abuse	Adherence
Timely acting on unsuppressed viral load	Viral load suppression
Tracing of PLHIV	Engagement and retention in care
Traditional medicine	Adherence
Turnaround time / Timely acting on unsuppressed viral load	VL and CD4 count testing
Turnaround time / Timely acting on unsuppressed viral load	Client's access to parameters
Viral load suppression	HIV(DR) transmission
Viral load suppression	HIV clinical manifestations
Viral load suppression	HIVDR selection
Viral load suppression	Required frequency of hospital visits
VL and CD4 count testing	Healthcare system workload
VL and CD4 count testing	Turnaround time / Timely acting on unsuppressed viral load
Waiting time at the healthcare facility	Medical privacy
Well functioning supply chain	Stock availability of ART and reagents
